# Supplementary material
Source: HighWire-hosted journal article supplement (https://thorax.bmj.com/highwire/filestream/173711/field_highwire_adjunct_files/0/6010827OnlineSupplement.pdf)
Supplement: 6010827OnlineSupplement.pdf [file 6010827OnlineSupplement.pdf]

## Online supplement

### Results

There was a correlation between exhaled LTB<sub>4</sub> and PGE<sub>2</sub> concentrations before treatment with ibuprofen ( $r=0.68$ ,  $p < 0.01$ ,  $n=14$ ) and before ( $r=0.65$ ,  $p < 0.01$ ,  $n=14$ ) and after matched placebo ( $r=0.70$ ,  $p < 0.005$ ,  $n=14$ ), but not after ibuprofen ( $r=-0.09$ ,  $p=0.75$ ,  $n=14$ ) (see fig S1A–C available online only). There was a correlation between LTB<sub>4</sub> and PGE<sub>2</sub> concentrations in EBC at baseline ( $r=0.58$ ,  $p < 0.02$ ,  $n=16$ ) and before treatment with rofecoxib ( $r=0.60$ ,  $p < 0.02$ ,  $n=16$ ), whereas there was a trend towards a correlation between LTB<sub>4</sub> and PGE<sub>2</sub> concentrations which did not reach statistical significance ( $r=0.49$ ,  $p=0.054$ ,  $n=16$ ) after treatment with rofecoxib (see fig S2A–C available online only). 8-Isoprostane concentrations in EBC were not correlated with the concentration of either LTB<sub>4</sub> or PGE<sub>2</sub> in either the ibuprofen or the rofecoxib study.

tx35592.f1

Figure S1 Correlation between LTB<sub>4</sub> and PGE<sub>2</sub> concentrations in exhaled breath condensate (A) before treatment with oral ibuprofen ( $r=0.68$ ,  $p < 0.01$ ,  $n=14$ ), (B) before matched placebo ( $r=0.65$ ,  $p < 0.01$ ,  $n=14$ ), and (C) after placebo (400 mg four times a day for 2 days) ( $r=0.70$ ,  $p < 0.005$ ,  $n=14$ ).

tx35592.f2

Figure S2 Correlation between LTB<sub>4</sub> and PGE<sub>2</sub> concentrations in exhaled breath condensate (A) at baseline ( $r=0.58$ ,  $p < 0.02$ ,  $n=16$ ), (B) before ( $r=0.60$ ,  $p < 0.02$ ,  $n=16$ ), and (C) after treatment with oral rofecoxib (25 mg once a day for 5 days) ( $r=0.49$ ,  $p=0.054$ ,  $n=16$ ).

tx35592.f3

Figure S3 Correlation between 8-isoprostane concentrations in exhaled breath condensate and PaO<sub>2</sub> values at baseline ( $r=-0.67$ ,  $p < 0.005$ ,  $n=16$ ).

tx35592.f4

Figure S4 (A) PaO<sub>2</sub>, (B) PaCO<sub>2</sub>, and (C) pH values in 10 patients with COPD at baseline (day –14), before (day 0), and after treatment with oral rofecoxib 25♣mg once a day for 5♣days (day 5).

Values are expressed as means.

**Table S1** Effects of oral ibuprofen (400♣mg qid) for 2♣days on pulmonary function tests in patients with COPD\*

|                           | <b>Pre-treatment (n=14)</b> | <b>Post-treatment (n=14)</b> | <b>p value</b> |
|---------------------------|-----------------------------|------------------------------|----------------|
| FEV <sub>1</sub> (l)      | 0.96 (0.10)                 | 0.93 (0.11)                  | 0.35           |
| FEV <sub>1</sub> (% pred) | 38.0 (3.4)                  | 37.4 (3.8)                   | 0.61           |
| FVC (l)                   | 2.06 (0.13)                 | 2.00 (0.13)                  | 0.18           |
| FVC (% pred)              | 66.1 (3.5)                  | 64.5 (4.1)                   | 0.26           |
| FEV <sub>1</sub> /FVC (%) | 45.7 (2.6)                  | 45.6 (2.7)                   | 0.89           |

COPD, chronic obstructive pulmonary disease; FEV<sub>1</sub>, forced expiratory volume in one second; FVC, forced vital capacity.

\*One patient was excluded from the study because of lack of compliance with treatment.

Data are expressed as mean (SE).

**Table S2** Effects of oral placebo (400♣mg qid) for 2♣days on pulmonary function tests in patients with COPD\*

|                           | <b>Pre-treatment (n=14)</b> | <b>Post-treatment (n=14)</b> | <b>p value</b> |
|---------------------------|-----------------------------|------------------------------|----------------|
| FEV <sub>1</sub> (l)      | 0.97 (0.11)                 | 0.99 (0.12)                  | 0.68           |
| FEV <sub>1</sub> (% pred) | 38.9 (4.0)                  | 39.2 (4.2)                   | 0.87           |
| FVC (l)                   | 2.08 (0.14)                 | 2.09 (0.14)                  | 0.85           |
| FVC (% pred)              | 66.5 (3.9)                  | 67.1 (4.2)                   | 0.79           |
| FEV <sub>1</sub> /FVC (%) | 45.2 (2.8)                  | 46.3 (3.3)                   | 0.98           |

COPD, chronic obstructive pulmonary disease; FEV<sub>1</sub>, forced expiratory volume in one second; FVC, forced vital capacity.

\*One patient was excluded from the study because of lack of compliance with treatment.

Data are expressed as mean (SE).

**Table S3** Effects of oral rofecoxib (25♣mg/day) for 5♣days on pulmonary function tests in patients with COPD\*

|                           | Visit 1 (n=16) | Visit 2(n=16) | Visit 3 (n=16) | p value |
|---------------------------|----------------|---------------|----------------|---------|
| FEV <sub>1</sub> (l)      | 1.51 (0.11)    | 1.53 (0.13)   | 1.49 (0.11)    | 0.50    |
| FEV <sub>1</sub> (% pred) | 59.6 (3.4)     | 58.5 (3.6)    | 58.3 (3.2)     | 0.45    |
| FVC (l)                   | 2.82 (0.18)    | 2.80 (0.20)   | 2.78 (0.17)    | 0.77    |
| FVC (% pred)              | 85.8 (3.8)     | 84.0 (3.8)    | 84.4 (3.4)     | 0.52    |
| FEV <sub>1</sub> /FVC (%) | 54.4 (2.6)     | 54.1 (2.3)    | 54.0 (2.5)     | 0.82    |

COPD, chronic obstructive pulmonary disease; FEV<sub>1</sub>, forced expiratory volume in one second; FVC, forced vital capacity.

\*Seventeen patients were enrolled. One patient was excluded from the study because of COPD exacerbation during treatment with rofecoxib.

Data are expressed as mean (SE).

**Table S4** Effects of oral rofecoxib (25♣mg/day) for 5♣days on absolute and differential cell counts in sputum in patients with COPD\*

|                                              | Visit 1 (n=15)   | Visit 2 (n=15)   | Visit 3 (n=15)   | p value |
|----------------------------------------------|------------------|------------------|------------------|---------|
| Total cell count (×10 <sup>5</sup> cells/ml) | 12.0 (6.5–15)    | 7.2 (4.9–11.6)   | 7.5 (5.3–10.1)   | 0.55    |
| Squamous cells (%)                           | 13.0 (10.5–35.5) | 13.0 (11.5–17.0) | 15.0 (7.0–20.0)  | 0.77    |
| Macrophages (×10 <sup>5</sup> cells/ml)      | 2.0 (1.1–2.9)    | 1.9 (1.1–3.2)    | 1.4 (1.0–2.5)    | 0.77    |
| Macrophages (%)                              | 27.7 (14.1–49.0) | 31.9 (16.3–45.6) | 26.6 (16.4–35.3) | 0.31    |
| Neutrophils (×10 <sup>5</sup> cells/ml)      | 6.6 (1.7–9.5)    | 4.3 (2.9–5.3)    | 4.5 (2.8–5.7)    | 0.77    |
| Neutrophils (%)                              | 67.8 (38.5–75.5) | 57.4 (44.3–73.8) | 64.6 (56.4–73.8) | 0.59    |
| Lymphocytes (×10 <sup>5</sup> cells/ml)      | 0.8 (0.4–1.2)    | 0.5 (0.2–1.0)    | 0.3 (0.2–1)      | 0.42    |
| Lymphocytes (%)                              | 10.6 (7.9–12.8)  | 9.1 (6.8–10.8)   | 8.1 (4.3–11.6)   | 0.53    |
| Eosinophils (×10 <sup>5</sup> cells/ml)      | 0.3 (0.1–0.4)    | 0.2 (0.2–0.3)    | 0.2 (0.1–0.3)    | 0.77    |
| Eosinophils (%)                              | 3.1 (2.9–3.6)    | 3.5 (3.0–3.7)    | 3.0 (2.9–3.6)    | 0.69    |

\*Seventeen patients were enrolled. One patient was excluded from the study because of COPD exacerbation during treatment with rofecoxib; three samples from another patient had more than 50% squamous cell contamination and were therefore excluded from analysis.

Values are expressed as median (25<sup>th</sup> to 75<sup>th</sup> percentile).

Squamous cells are expressed as the percentage of all cells. Macrophages, neutrophils, lymphocytes, and eosinophil counts are expressed as the percentage of non-squamous cells.
